# Supplementary material for: The Regulatory Role of EvfG Through Coordinated Control of Flagellar Biosynthesis and Energy Metabolism in Porcine Extraintestinal Pathogenic Escherichia coli (ExPEC)
Source: MDPI journal article supplement (doi:10.3390/biology14070822), 2025-07-07
Supplement: s1 [file Supplementary Table S4.pdf › Supplementary Table S4.pdf]

**Table S4.** The differentially expressed genes of 7 GO enrichment pathways detected in the  $\Delta evfG$  compared to PCN033

| GO Function                                  | Gene ID         | Ko name         | Gene description                                     | FC ( $\Delta evfG$ /<br>PCN033) | P_value     |
|----------------------------------------------|-----------------|-----------------|------------------------------------------------------|---------------------------------|-------------|
| <b>Bacterial-type flagellum organization</b> |                 |                 |                                                      |                                 |             |
|                                              | PPECC33_RS01420 | flgM            | flagellar biosynthesis anti-sigma factor FlgM        | 0.273                           | 0.000212209 |
|                                              | PPECC33_RS10565 | fliR            | flagellar biosynthetic protein FliR                  | 0.083                           | 4.69339E-18 |
|                                              | PPECC33_RS10450 | fliS            | flagellar export chaperone FliS                      | 0.429                           | 1.26443E-08 |
|                                              | PPECC33_RS05785 | flgN            | flagella biosynthesis chaperone FlgN                 | 0.363                           | 1.53295E-12 |
|                                              | PPECC33_RS05795 | flgA            | flagellar basal body P-ring formation chaperone FlgA | 0.036                           | 1.58971E-31 |
|                                              | PPECC33_RS10225 | flhA            | flagellar biosynthesis protein FlhA                  | 0.133                           | 3.84629E-25 |
|                                              | PPECC33_RS10440 | PPECC33_RS10440 | FliC/FljB family flagellin                           | 0.283                           | 5.80724E-21 |
|                                              | PPECC33_RS01495 | lafA            | lateral flagellin LafA                               | 0.1                             | 6.42579E-35 |
|                                              | PPECC33_RS01505 | fliD            | flagellar filament capping protein FliD              | 0.179                           | 1.13126E-05 |
| <b>Flagellum-dependent cell motility</b>     |                 |                 |                                                      |                                 |             |
|                                              | PPECC33_RS10505 | fliF            | flagellar basal-body MS-ring/collar protein FliF     | 0.017                           | 1.22028E-46 |
|                                              | PPECC33_RS10510 | fliG            | flagellar motor switch protein FliG                  | 0.028                           | 3.46146E-48 |
|                                              | PPECC33_RS10525 | fliJ            | flagellar export protein FliJ                        | 0.034                           | 6.87667E-40 |
|                                              | PPECC33_RS05835 | flgI            | flagellar basal body P-ring protein FlgI             | 0.088                           | 6.39132E-37 |
|                                              | PPECC33_RS05830 | flgH            | flagellar basal body L-ring protein FlgH             | 0.06                            | 1.08363E-42 |
|                                              | PPECC33_RS18010 | rpoA            | DNA-directed RNA polymerase subunit alpha            | 0.247                           | 7.67719E-09 |
|                                              | PPECC33_RS21995 | rpoB            | DNA-directed RNA polymerase subunit beta             | 0.264                           | 1.07085E-12 |
|                                              | PPECC33_RS10280 | motA            | flagellar motor stator protein MotA                  | 0.303                           | 1.97387E-32 |
|                                              | PPECC33_RS10500 | fliE            | flagellar hook-basal body complex protein FliE       | 0.052                           | 2.09921E-08 |
|                                              | PPECC33_RS10515 | fliH            | flagellar assembly protein FliH                      | 0.033                           | 1.84204E-54 |
|                                              | PPECC33_RS06330 | ycgR            | flagellar brake protein                              | 0.415                           | 4.56059E-07 |
|                                              | PPECC33_RS10535 | fliL            | flagellar basal body-associated protein FliL         | 0.06                            | 1.80126E-28 |
|                                              | PPECC33_RS10275 | motB            | flagellar motor protein MotB                         | 0.388                           | 9.51938E-13 |

**Chemotaxis**

|                 |      |                                                                  |       |             |
|-----------------|------|------------------------------------------------------------------|-------|-------------|
| PPECC33_RS24205 | Tsr  | methyl-accepting chemotaxis protein                              | 0.105 | 4.16086E-61 |
| PPECC33_RS10260 | Tar  | methyl-accepting chemotaxis protein II                           | 0.429 | 1.78965E-13 |
| PPECC33_RS10265 | cheW | chemotaxis protein CheW                                          | 0.424 | 6.28466E-14 |
| PPECC33_RS10270 | cheA | chemotaxis protein CheA                                          | 0.312 | 2.06591E-20 |
| PPECC33_RS05840 | flgJ | flagellar assembly peptidoglycan hydrolase FlgJ                  | 0.086 | 4.46244E-38 |
| PPECC33_RS16920 | Aer  | aerotaxis sensor receptor Aer                                    | 0.222 | 1.32377E-20 |
| PPECC33_RS10540 | fliM | flagellar motor switch protein FliM                              | 0.045 | 5.1021E-48  |
| PPECC33_RS10545 | fliN | flagellar motor switch protein FliN                              | 0.056 | 1.54974E-45 |
| PPECC33_RS11580 | mglB | galactose/glucose ABC transporter substrate-binding protein MglB | 0.375 | 0.000370357 |
| PPECC33_RS07750 | Trg  | methyl-accepting chemotaxis protein Trg                          | 0.206 | 4.58105E-24 |

**Bacterial-type flagellum hook**

|                 |      |                                            |       |             |
|-----------------|------|--------------------------------------------|-------|-------------|
| PPECC33_RS10530 | fliK | flagellar hook-length control protein FliK | 0.036 | 1.4921E-48  |
| PPECC33_RS10445 | fliD | flagellar filament capping protein FliD    | 0.3   | 2.80055E-28 |
| PPECC33_RS05850 | flgL | flagellar hook-associated protein FlgL     | 0.335 | 3.03831E-20 |
| PPECC33_RS05815 | flgE | flagellar hook protein FlgE                | 0.034 | 1.23924E-81 |
| PPECC33_RS05845 | flgK | flagellar hook-associated protein FlgK     | 0.276 | 7.04884E-18 |
| PPECC33_RS05810 | flgD | flagellar hook assembly protein FlgD       | 0.03  | 3.66581E-70 |

**Bacterial-type flagellum-dependent swarming motility**

|                 |      |                                       |       |             |
|-----------------|------|---------------------------------------|-------|-------------|
| PPECC33_RS05825 | flgG | flagellar basal-body rod protein FlgG | 0.048 | 6.14995E-63 |
| PPECC33_RS05800 | flgB | flagellar basal body rod protein FlgB | 0.015 | 2.12707E-63 |
| PPECC33_RS05805 | flgC | flagellar basal body rod protein FlgC | 0.026 | 6.33333E-56 |
| PPECC33_RS05820 | flgF | flagellar basal-body rod protein FlgF | 0.037 | 1.45829E-56 |

**Negative regulation of bacterial-type flagellum assembly**

|                 |      |                                               |       |             |
|-----------------|------|-----------------------------------------------|-------|-------------|
| PPECC33_RS04425 | ybjN | YbjN domain-containing protein                | 0.449 | 5.33483E-09 |
| PPECC33_RS10455 | fliT | flagella biosynthesis regulatory protein FliT | 0.442 | 1.68584E-05 |

**Bacterial-type flagellum secretion apparatus**

|                 |      |                                                       |       |             |
|-----------------|------|-------------------------------------------------------|-------|-------------|
| PPECC33_RS10550 | fliO | flagellar biosynthetic protein FliO                   | 0.081 | 5.6779E-16  |
| PPECC33_RS10555 | fliP | flagellar type III secretion system pore protein FliP | 0.053 | 8.74385E-34 |
| PPECC33_RS10560 | fliQ | flagellar biosynthesis protein FliQ                   | 0.048 | 3.54131E-19 |
| PPECC33_RS10520 | fliI | flagellar protein export ATPase FliI                  | 0.024 | 6.64429E-48 |

---
